# Supplementary material for: AWA and ASH Homologous Sensing Genes of Meloidogyne incognita Contribute to the Tomato Infection Process
Source: MDPI journal article supplement (doi:10.3390/pathogens11111322), 2022-11-10
Supplement: s1 [file s1]

Table S1

| Comparison of homologous genes between <i>Meloidogyne incognita</i> and <i>Caenorhabditis elegans</i> |               |                              |               |  |  |  |
|-------------------------------------------------------------------------------------------------------|---------------|------------------------------|---------------|--|--|--|
|                                                                                                       | Homology Type | <i>Meloidogyne incognita</i> | Gene Name     |  |  |  |
|                                                                                                       | GPCRs         | Minc3s01623g25167            | <i>odr-10</i> |  |  |  |
|                                                                                                       | GPCRs         | Minc3s00050g02698            | <i>odr-7</i>  |  |  |  |
|                                                                                                       | G protein     | Minc3s01972g27520            | <i>gpa-6</i>  |  |  |  |
|                                                                                                       | G protein     | Minc3s00003g00191            | <i>gpa-11</i> |  |  |  |
|                                                                                                       | PLC           | Minc3s00012g00794            | <i>plc-1</i>  |  |  |  |
|                                                                                                       | PLC           | Minc3s05559g38432            | <i>egl-8</i>  |  |  |  |
|                                                                                                       | PLC           | Minc3s00270g09074            | <i>unc-13</i> |  |  |  |
|                                                                                                       | PLC           | Minc3s00483g13114            | <i>elo-1</i>  |  |  |  |
|                                                                                                       | TRPV          | Minc3s00057g02942            | <i>osm-9</i>  |  |  |  |

Table S2

| Comparison of protein homology between <i>Meloidogyne incognita</i> and <i>Caenorhabditis elegans</i> |               |                      |  |  |  |  |
|-------------------------------------------------------------------------------------------------------|---------------|----------------------|--|--|--|--|
| <i>Meloidogyne incognita</i>                                                                          | Gene Name     | Protein Homology (%) |  |  |  |  |
| Minc3s01623g25167                                                                                     | <i>odr-10</i> | 43.49                |  |  |  |  |
| Minc3s00050g02698                                                                                     | <i>odr-7</i>  | 66.57                |  |  |  |  |
| Minc3s01972g27520                                                                                     | <i>gpa-6</i>  | 41.76                |  |  |  |  |
| Minc3s00003g00191                                                                                     | <i>gpa-11</i> | 53.44                |  |  |  |  |
| Minc3s00012g00794                                                                                     | <i>plc-1</i>  | 64.99                |  |  |  |  |
| Minc3s05559g38432                                                                                     | <i>egl-8</i>  | 70.91                |  |  |  |  |
| Minc3s00270g09074                                                                                     | <i>unc-13</i> | 83.76                |  |  |  |  |
| Minc3s00483g13114                                                                                     | <i>elo-1</i>  | 73.78                |  |  |  |  |
| Minc3s00057g02942                                                                                     | <i>osm-9</i>  | 66.4                 |  |  |  |  |

Table S3

| Primer information of RNAi for <i>Meloidogyne incognita</i> |                                             |                                             |  |  |  |  |
|-------------------------------------------------------------|---------------------------------------------|---------------------------------------------|--|--|--|--|
| <i>Meloidogyne incognita</i>                                | Prime F                                     | Prime R                                     |  |  |  |  |
| Minc3s01623g25167                                           | TAATACGACTCATATAGGGAGCTGGGCCCTTCACAAAATGGA  | TAATACGACTCATATAGGGAGAAACGTGGTGGTGTCTGTTAA  |  |  |  |  |
| Minc3s00050g02698                                           | TAATACGACTCATATAGGGAGCAACAACCTAGTAGAACCCAGC | TAATACGACTCATATAGGGAGGTCTTATCACGCACCCGCTG   |  |  |  |  |
| Minc3s01972g27520                                           | TAATACGACTCATATAGGGAGGCGATTGTGGACTGATTCTGG  | TAATACGACTCATATAGGGAGCATCGTTACGGCATCAAATACA |  |  |  |  |
| Minc3s00003g00191                                           | TAATACGACTCATATAGGGAGCGGAGGCGACGTACTATAGA   | TAATACGACTCATATAGGGAGTGTCCGCCAACATCTACCAT   |  |  |  |  |
| Minc3s00012g00794                                           | TAATACGACTCATATAGGGAGAAAGAGCATGAACCCGATCCT  | TAATACGACTCATATAGGGAGGAGAGGGCAATCTAGGCTC    |  |  |  |  |
| Minc3s05559g38432                                           | TAATACGACTCATATAGGGAGTTTTATGCGACGTCCAGACC   | TAATACGACTCATATAGGGAGTGGCGAGAAAGGTAAGCTTT   |  |  |  |  |
| Minc3s00270g09074                                           | TAATACGACTCATATAGGGAGTACAAAGAGCCGCCGAAAAG   | TAATACGACTCATATAGGGAGCGAATTGCTCCGCTAACAACT  |  |  |  |  |
| Minc3s00483g13114                                           | TAATACGACTCATATAGGGAGTCTGCCATTTTCTCAACCA    | TAATACGACTCATATAGGGAGAGCAGACCCATTACTAGCCT   |  |  |  |  |
| Minc3s00057g02942                                           | TAATACGACTCATATAGGGAGAAACGAAGCAAAAATCCGCCTT | TAATACGACTCATATAGGGAGAAAGCCTTCCATTTGTCAGCT  |  |  |  |  |

| RT-qPCR primers for <i>Meloidogyne incognita</i> |                        |                        |  |  |  |  |
|--------------------------------------------------|------------------------|------------------------|--|--|--|--|
| <i>Meloidogyne incognita</i>                     | Prime F                | Prime R                |  |  |  |  |
| Minc3s01623g25167                                | CCATTGCTCTAAGTTGGGTTGT | AGCCTGAATGAGAAGAGTCTCT |  |  |  |  |
| Minc3s00050g02698                                | CTCTGAACGTGTCCAAACCC   | GTCTTATCACGCACCCGCTG   |  |  |  |  |
| Minc3s01972g27520                                | GCGATTGTGGACTGATTCTGG  | GGTTCGTAATTGGGCTGTCC   |  |  |  |  |
| Minc3s00003g00191                                | CGCATAACATGACCGAGGTG   | GCCTTCTCCATACTGACACG   |  |  |  |  |
| Minc3s00012g00794                                | TACCGGACGATGTACTCACC   | GAAGAGGAGACACAGGCCAA   |  |  |  |  |
| Minc3s05559g38432                                | TGCTGGTTGTCAAATGGCAG   | GGTCTGGACGTCCGATAAAA   |  |  |  |  |
| Minc3s00270g09074                                | CCTTCACAAGACCAACCTGT   | TTGCCAGCGAAGATCATTGG   |  |  |  |  |
| Minc3s00483g13114                                | ACGGATATTGGGTCTGGCTT   | AATGCTGGCGTGATAGGGTA   |  |  |  |  |
| Minc3s00057g02942                                | TGAATGTACAGCTACGCAG    | AGAGGGTAAGCACTGCATGT   |  |  |  |  |

|                  |               |                                                                      |  |  |  |  |                        |  |  |  |  |
|------------------|---------------|----------------------------------------------------------------------|--|--|--|--|------------------------|--|--|--|--|
|                  |               | <b>In situ hybridization primer for <i>Meloidogyne incognita</i></b> |  |  |  |  |                        |  |  |  |  |
|                  |               |                                                                      |  |  |  |  |                        |  |  |  |  |
| <b>Gene Name</b> |               | <b>Prime F</b>                                                       |  |  |  |  | <b>Prime R</b>         |  |  |  |  |
|                  | <i>gpa-6</i>  | GCGATTGTGGACTGATTCTGG                                                |  |  |  |  | CATCGTTACGGCATCAAATACA |  |  |  |  |
|                  | <i>odr-10</i> | CTGGGCCTTCACAAAATGGA                                                 |  |  |  |  | AAACGTGGTGGTGCTGTAA    |  |  |  |  |
